# Supplementary material for: Carotenoid Content in Breastmilk in the 3rd and 6th Month of Lactation and Its Associations with Maternal Dietary Intake and Anthropometric Characteristics
Source: PubMed Central journal article supplement (PMC6356523; doi:10.3390/nu11010193), 2019-01-18
Supplement: nutrients-11-00193-s001.pdf [file nutrients-11-00193-s001.pdf]

# Carotenoid Content in Breastmilk in the 3<sup>rd</sup> and 6<sup>th</sup> Month of Lactation and its Associations with Maternal Dietary Intake and Anthropometric Characteristics

Monika A. Zielinska , Jadwiga Hamulka, Aleksandra Wesolowska

Table S1. Characteristics of the study group.

| Variables                                                                   | 1 <sup>st</sup> study visit | 3 <sup>rd</sup> study visit |
|-----------------------------------------------------------------------------|-----------------------------|-----------------------------|
|                                                                             | n=53 (100%)                 | n=47 (89%)                  |
|                                                                             | Mean ± SD <sup>1</sup>      | Mean ± SD <sup>1</sup>      |
|                                                                             | min – max                   | min – max                   |
|                                                                             | n (%)                       | n (%)                       |
| <b>Maternal age (years)</b>                                                 | 31.4 ± 3.8                  | 31.1 ± 3.6                  |
|                                                                             | 23 – 40                     | 23 – 40                     |
| <b>Maternal education (%)</b>                                               |                             |                             |
| - secondary school or university student                                    | 3 (6)                       | 2 (4)                       |
| - university, graduated                                                     | 50 (94)                     | 45 (96)                     |
| <b>Parity (%)</b>                                                           |                             |                             |
| - primiparous                                                               | 25 (47)                     | 22 (47)                     |
| - multiparous                                                               | 28 (53)                     | 25 (53)                     |
| <b>Average income per capita (%)</b>                                        |                             |                             |
| - < 1000 PLN                                                                | 4 (8)                       | 4 (8)                       |
| - 1000 – 1500 PLN                                                           | 12 (21)                     | 10 (21)                     |
| - >1500 PLN                                                                 | 37 (71)                     | 33 (71)                     |
| <b>Civil status (%)</b>                                                     |                             |                             |
| - non-formal relationship                                                   | 9 (17)                      | 7 (15)                      |
| - marriage                                                                  | 44 (83)                     | 40 (85)                     |
| <b>Maternal prepregnancy BMI (kg/m<sup>2</sup>)</b>                         | 22.3 ± 3.8                  | 22.4 ± 3.6                  |
|                                                                             | 18.4 – 38.6                 | 18 – 39                     |
| <b>Maternal prepregnancy nutritional status (%)</b>                         |                             |                             |
| - underweight                                                               | 1 (2)                       | 1 (2)                       |
| - normal weight                                                             | 46 (87)                     | 41 (87)                     |
| - overweight or obesity                                                     | 6 (11)                      | 5 (11)                      |
| <b>Maternal BMI at 1<sup>st</sup> month of lactation (kg/m<sup>2</sup>)</b> | 23.8 ± 3.6                  | 23.8 ± 3.8                  |
|                                                                             | 18.4 – 39.7                 | 18.4 – 39.7                 |
| <b>Maternal nutritional status at 1<sup>st</sup> month of lactation (%)</b> |                             |                             |
| - underweight                                                               | 1 (2)                       | 1 (2)                       |
| - normal weight                                                             | 40 (78)                     | 37 (79)                     |
| - overweight or obesity                                                     | 10 (20)                     | 9 (19)                      |
| <b>Maternal BMI at 3<sup>rd</sup> month of lactation (kg/m<sup>2</sup>)</b> | 23.2 ± 3.8                  | 23.3 ± 3.8                  |
|                                                                             | 18.1 – 40.8                 | 18.1 – 40.8                 |
| <b>Maternal nutritional status at 3<sup>rd</sup> month of lactation (%)</b> |                             |                             |

|                                                                             |                 |                 |
|-----------------------------------------------------------------------------|-----------------|-----------------|
| - underweight                                                               | 1 (2)           | 1 (2)           |
| - normal weight                                                             | 42 (86)         | 40 (85)         |
| - overweight or obesity                                                     | 6 (12)          | 6 (13)          |
| <b>Maternal BMI at 6<sup>th</sup> month of lactation (kg/m<sup>2</sup>)</b> | 22.8 ± 4.0      | 22.8 ± 4.0      |
|                                                                             | 19.0 – 42.6     | 19.0 – 42.6     |
| <b>Maternal nutritional status at 6<sup>th</sup> month of lactation (%)</b> |                 |                 |
| - underweight                                                               | -               | -               |
| - normal weight                                                             | 40 (85)         | 40 (85)         |
| - overweight or obesity                                                     | 7 (15)          | 7 (15)          |
| <b>Mode of delivery (%)</b>                                                 |                 |                 |
| - vaginal                                                                   | 27 (51)         | 25 (53)         |
| - vaginal with vacuum or forceps use                                        | 2 (4)           | 1 (2)           |
| - planned cesarean section                                                  | 13 (25)         | 11 (23)         |
| - emergency cesarean section                                                | 11 (21)         | 10 (21)         |
| <b>Infant gender (%)</b>                                                    |                 |                 |
| - female                                                                    | 28 (53)         | 25 (53)         |
| - male                                                                      | 25 (47)         | 22 (47)         |
| <b>Gestational age (weeks)</b>                                              | 39.3 ± 1.2      | 39.3 ± 1.3      |
|                                                                             | 37 - 42         | 37 - 42         |
| <b>Birthweight (g)</b>                                                      | 3391.4 ± 357.5  | 3383.0 ± 370.4  |
|                                                                             | 2730.0 – 4240.0 | 2730.0 – 4240.0 |
| <b>Birth length (cm)</b>                                                    | 54.0 ± 2.5      | 54.0 ± 2.6      |
|                                                                             | 47 – 59         | 47 – 59         |

<sup>1</sup> SD – standard deviation.

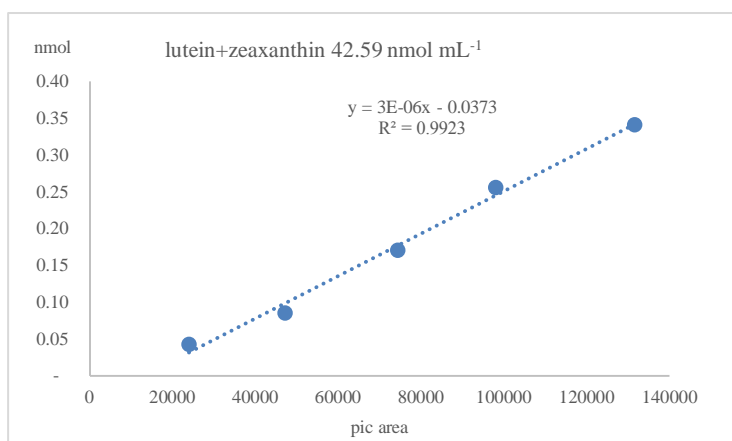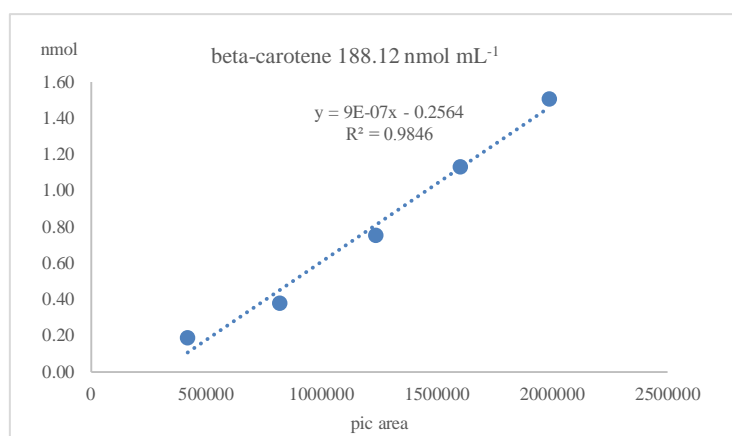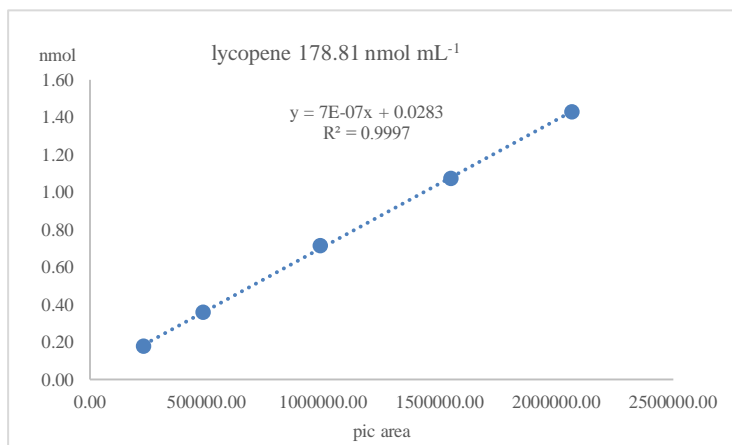

Figure S1: The standard curves for all carotenoids used in presented manuscript.
